# Supplementary material
Source: ML conference proceedings conference paper supplement (https://openaccess.thecvf.com/content/CVPR2023/html/Liu_Hierarchical_Prompt_Learning_CVPR_2023_paper.html)
Supplement: Supplementary file 1 [file Liu_Hierarchical_Prompt_Learning_CVPR_2023_supplemental.pdf]

# Supplementary Materials for the Paper: Hierarchical Prompt Learning for Multi-Task Learning

Anonymous CVPR submission

Paper ID 10747

## 1. Loss and Error Landscape Visualizations

Inspired by [1], we provide visualizations of train loss and test error surfaces. Given three classifier weights  $w_1$ ,  $w_2$ , and  $w_3$  (i.e.,  $w_{rand}$ ,  $w_{shr}$ , and  $w_{ind}$ ), we set  $u=w_2-w_1$  and  $v=w_3-w_1-\langle w_3-w_1, \hat{u} \rangle \hat{u}$ , where  $\hat{u}$  is the normalized vector  $\hat{u}=u/\|u\|$ . Thus,  $\hat{u}$  and  $\hat{v}$  represent an orthonormal basis in the plane which contains  $w_1$ ,  $w_2$ , and  $w_3$ . We can evaluate the train loss and test error of the corresponding model parameters by sampling on this plane. Note that  $w_{avg}$  is a linear combination of  $w_{ind}$  and  $w_{shr}$ , which lies in the plane defined by  $w_{ind}$ ,  $w_{shr}$ , and  $w_{rand}$ .

## 2. Additional Visualizations of Hierarchical Task Clustering

As shown in Figure A1, we provide additional hierarchical task clustering results on Office-Home (with the split of 20%), DomainNet (with the split of 2%), and the large-scale multi-task learning benchmark (with 16-shot). Similar tasks, e.g., Real and Product on Office-Home, are clustered together.

## 3. Detail Results of 10 Downstream Tasks

Detail results of our HiPro and other baselines on 10 downstream classification tasks are shown in Figure A2.

## References

- [1] T. Garipov, Pavel Izmailov, Dmitrii Podoprikhin, Dmitry P. Vetrov, and Andrew Gordon Wilson. Loss surfaces, mode connectivity, and fast ensembling of dnns. In *NeurIPS*, 2018.

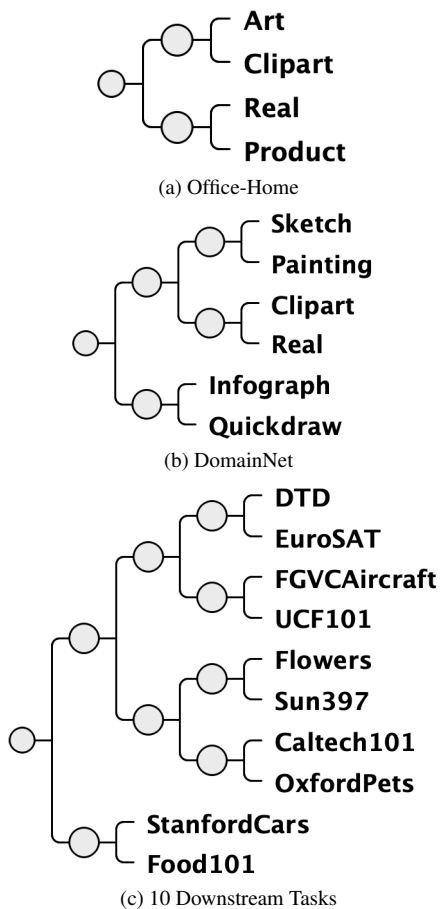

Figure A1. Hierarchical task clustering results of HiPro on Office-Home, DomainNet, and the large-scale multi-task learning benchmark.

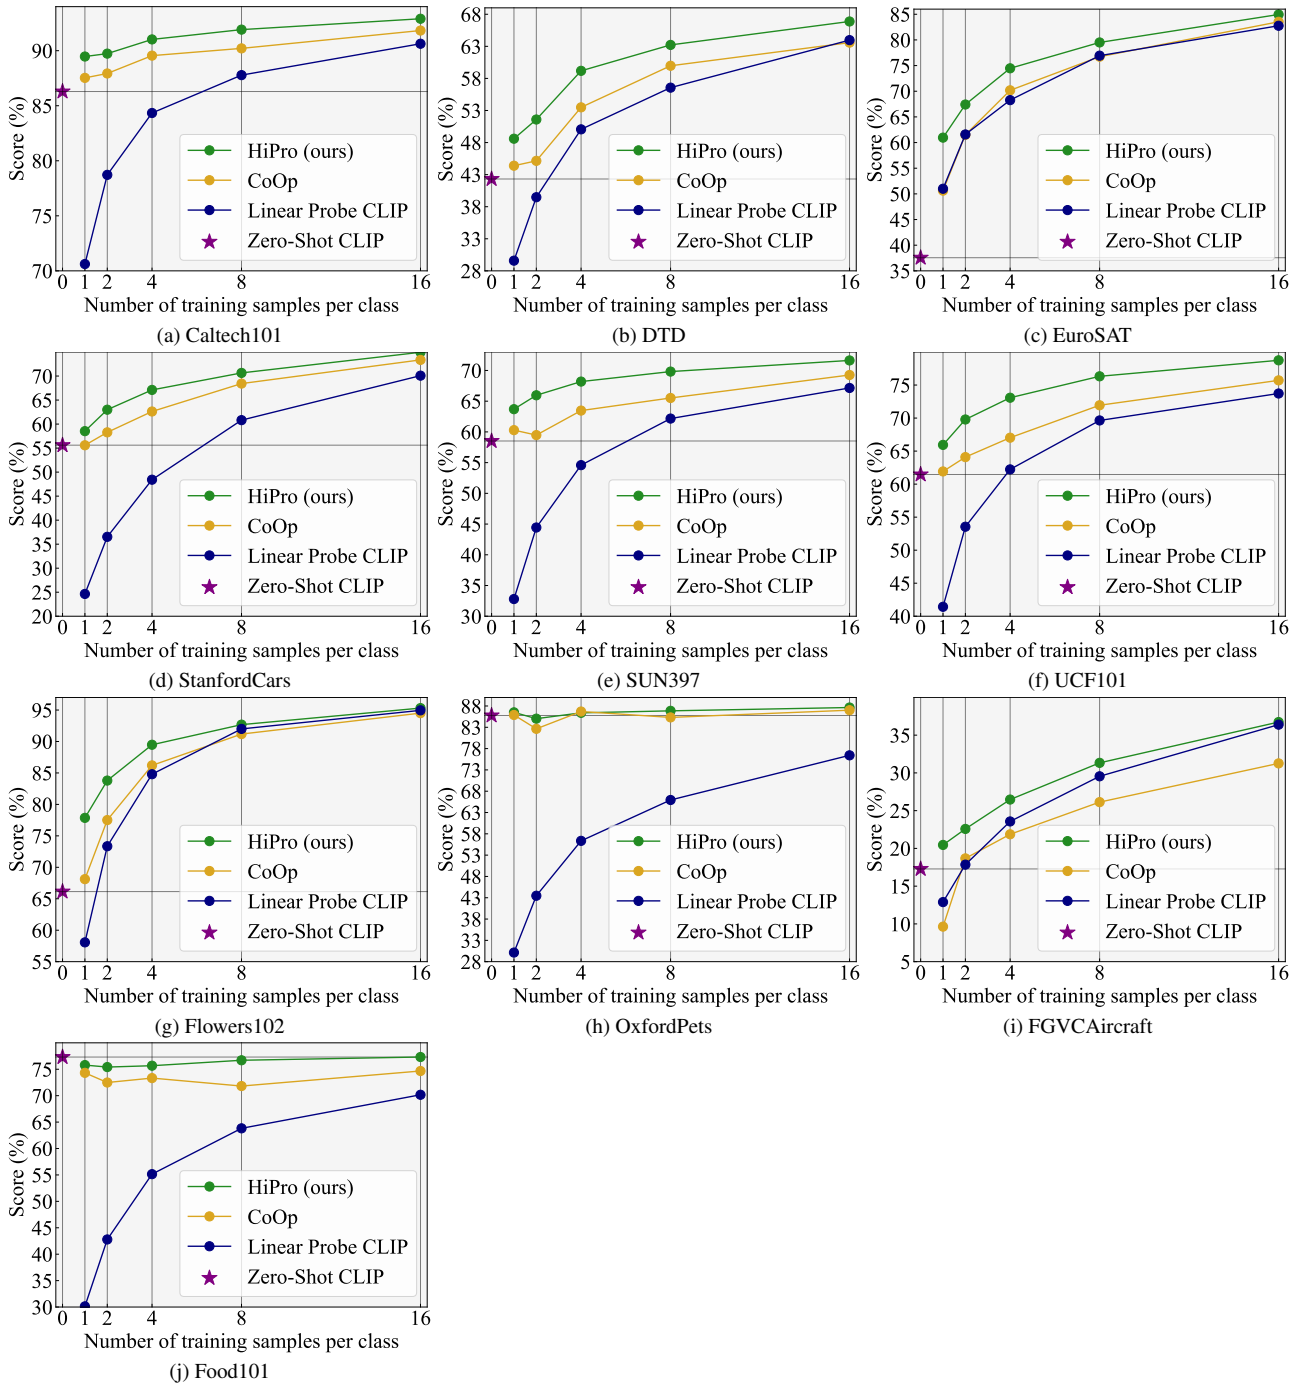

Figure A2. Detail results on 10 downstream tasks.
